# Supplementary material
Source: publisher site journal article supplement (https://www.spandidos-publications.com/4521/downloadSupplementary)

Figure S1. Analysis of *HCAR1* knockout efficiency. (A) T7E1 assays for measuring CRISPR-Cas9 cleavage efficiency. Lane 1: DL2000 marker; Lane 2: T7E1-digested DNA fragments from cell post-transduction with sgRNA-1; Lane 3: T7E1-digested DNA fragments from cell post-transduction with sgRNA-2; Lane 4: T7E1-digested DNA fragments from cell post-transduction with sgRNA-3; Lane 5: T7E1-digested DNA fragments from wildtype MCF7 cell. (B) DNA sequences of *HCAR1* locus from each *HCAR1* knockout clones. *HCAR1*, hydroxyl carboxylic acid receptor 1; sgRNA, single-guide RNA.

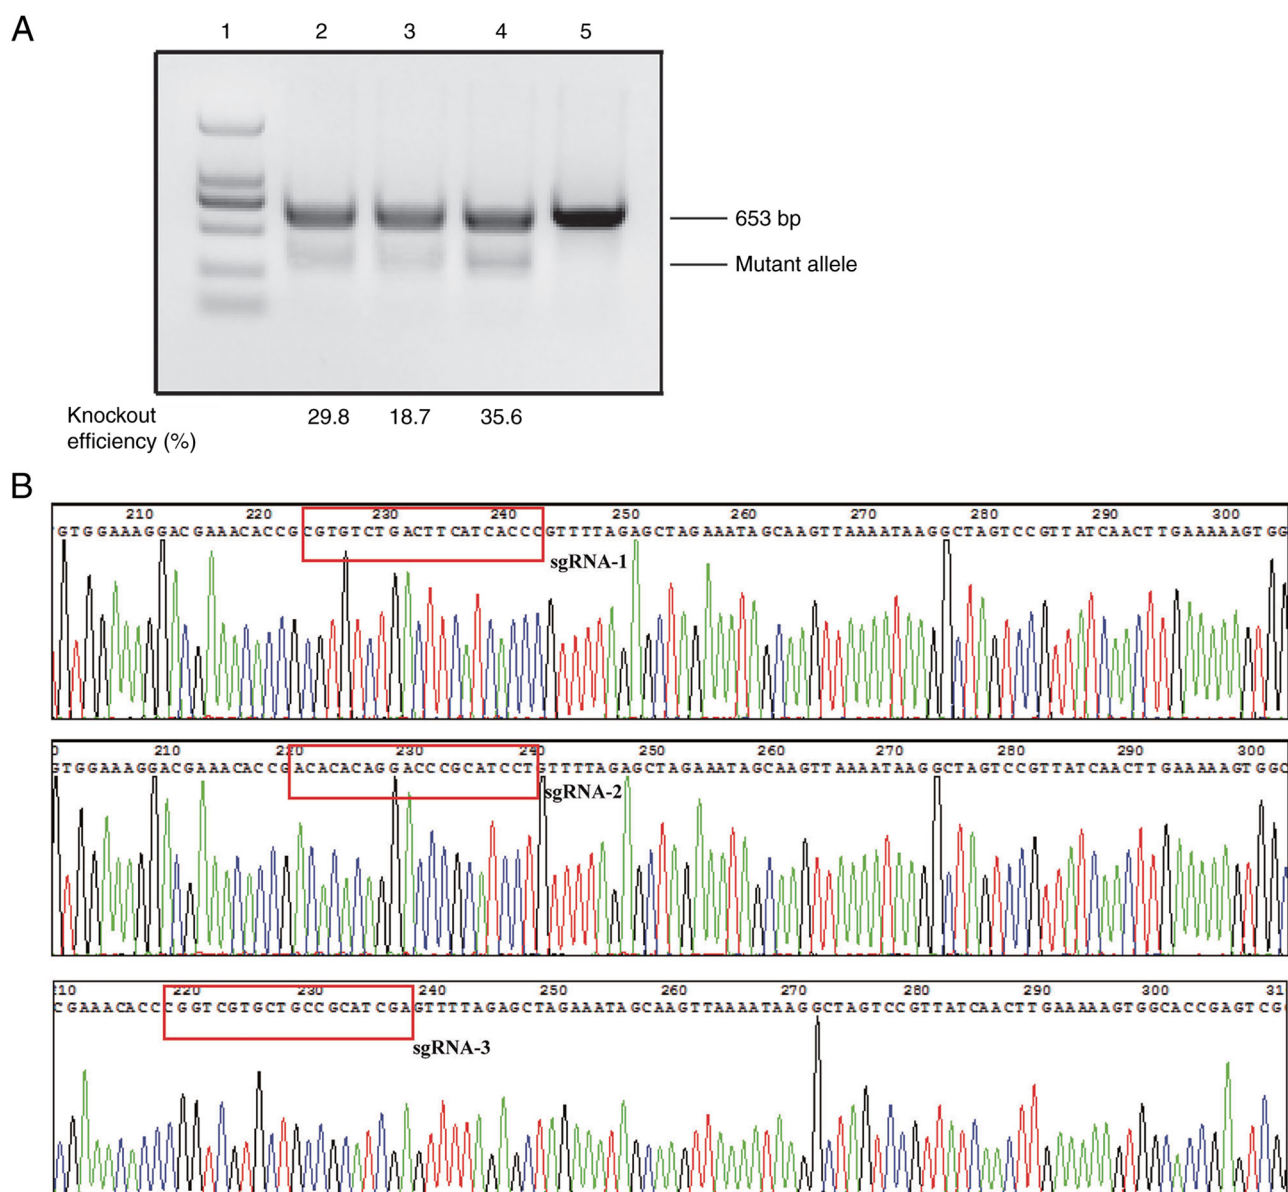

Figure S2. Re-expression of HCAR1 in KO MCF7 cells. The protein level of HCAR1 in the KO + HCAR1 group was evaluated by western blotting. HCAR1, hydroxyl carboxylic acid receptor 1; KO, knockout; WT, wild-type.

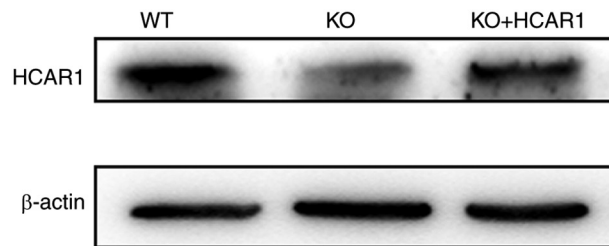

Supplement: Supplementary file 1 [file downloadSupplementary]
